# Supplementary material for: Aitken mode particles as CCN in aerosol- and updraft-sensitive regimes of cloud droplet formation
Source: Copernicus journal article supplement (doi:10.5194/acp-21-11723-2021), 2021-08-06
Supplement: Supplementary file 1 [file acp-21-11723-2021-supplement.pdf]

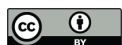

*Supplement of*

## **Aitken mode particles as CCN in aerosol- and updraft-sensitive regimes of cloud droplet formation**

**Mira L. Pöhlker et al.**

*Correspondence to:* Mira L. Pöhlker (m.pohlker@mpic.de) and Barbara Ervens (barbara.ervens@uca.fr)

The copyright of individual parts of the supplement might differ from the article licence.

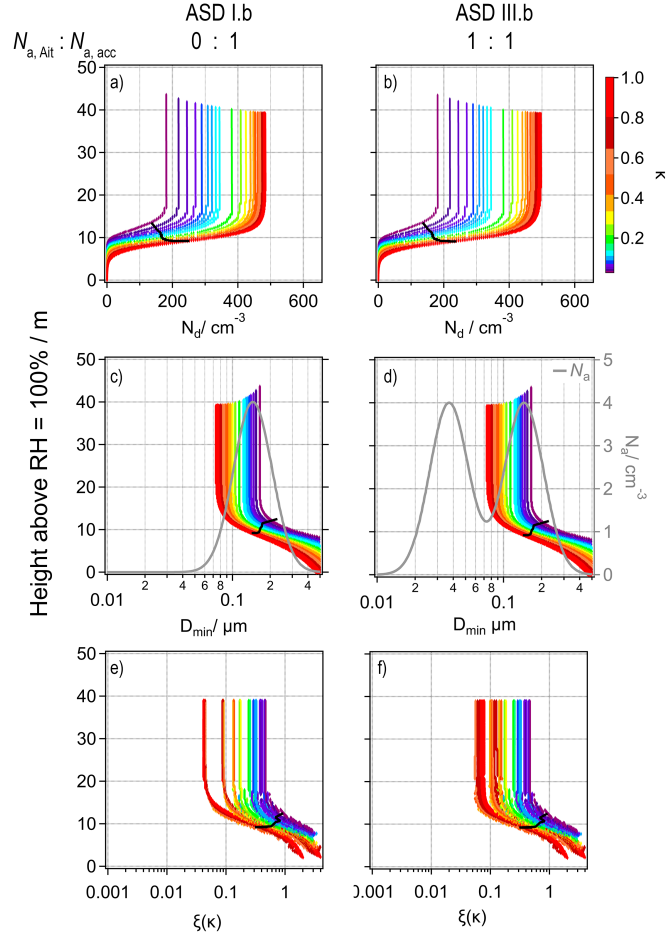

**Figure S1.** Vertical profiles of (a,b) droplet number concentration ( $N_d$ ), (c, d) dry size of smallest particles that contribute to  $N_d$  ( $D_{min}$ ), overlaid by the ASD (grey lines), and (e, f) sensitivity of  $N_d$  to  $\kappa$  ( $\xi(\kappa)$ ) for an updraft velocity  $w = 1.0 \text{ m s}^{-1}$ . Left and right columns show results for ASD I.b and III.b, respectively. The black lines denote the height of  $S_{max}$ .

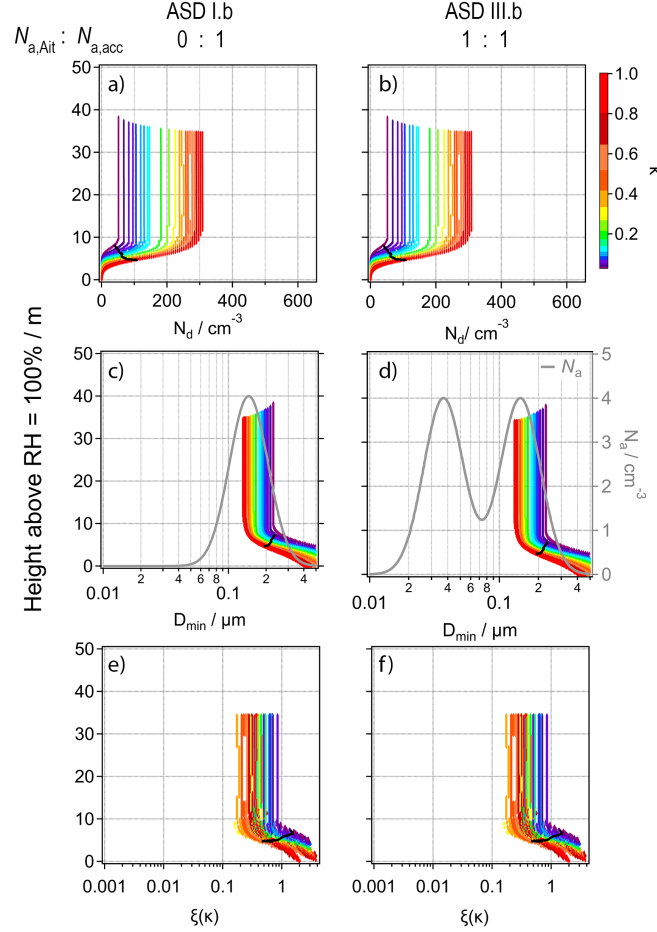

**Figure S2.** Vertical profiles of (a,b) droplet number concentration ( $N_d$ ), (c, d) dry size of smallest particles that contribute to  $N_d$  ( $D_{min}$ ), overlaid by the ASD (grey lines), and (e, f) sensitivity of  $N_d$  to  $\kappa$  ( $\xi(\kappa)$ ) for an updraft velocity  $w = 0.2 \text{ m s}^{-1}$ . Left and right columns show results for ASD I.b and III.b, respectively. The black lines denote the height of  $S_{max}$ .

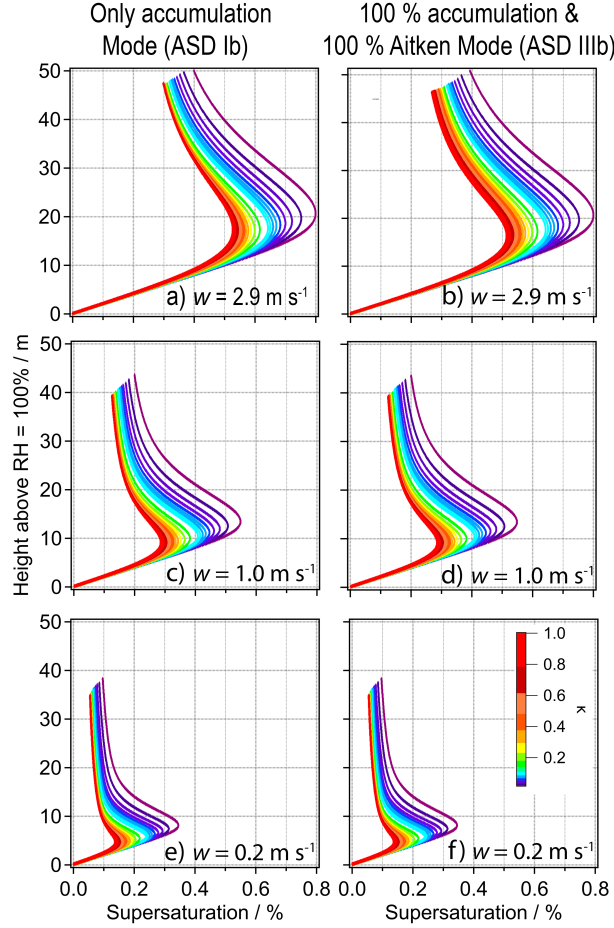

**Figure S3.** Left column: Supersaturation [%] for ASD I.b as a function of  $\kappa$  for a)  $w = 2.9 \text{ m s}^{-1}$ , c)  $1.0 \text{ m s}^{-1}$ , e)  $0.2 \text{ m s}^{-1}$ ; Right column: Supersaturation [%] for ASD III.b as a function of  $\kappa$  for b)  $w = 2.9 \text{ m s}^{-1}$ , d)  $1.0 \text{ m s}^{-1}$ , f)  $0.2 \text{ m s}^{-1}$



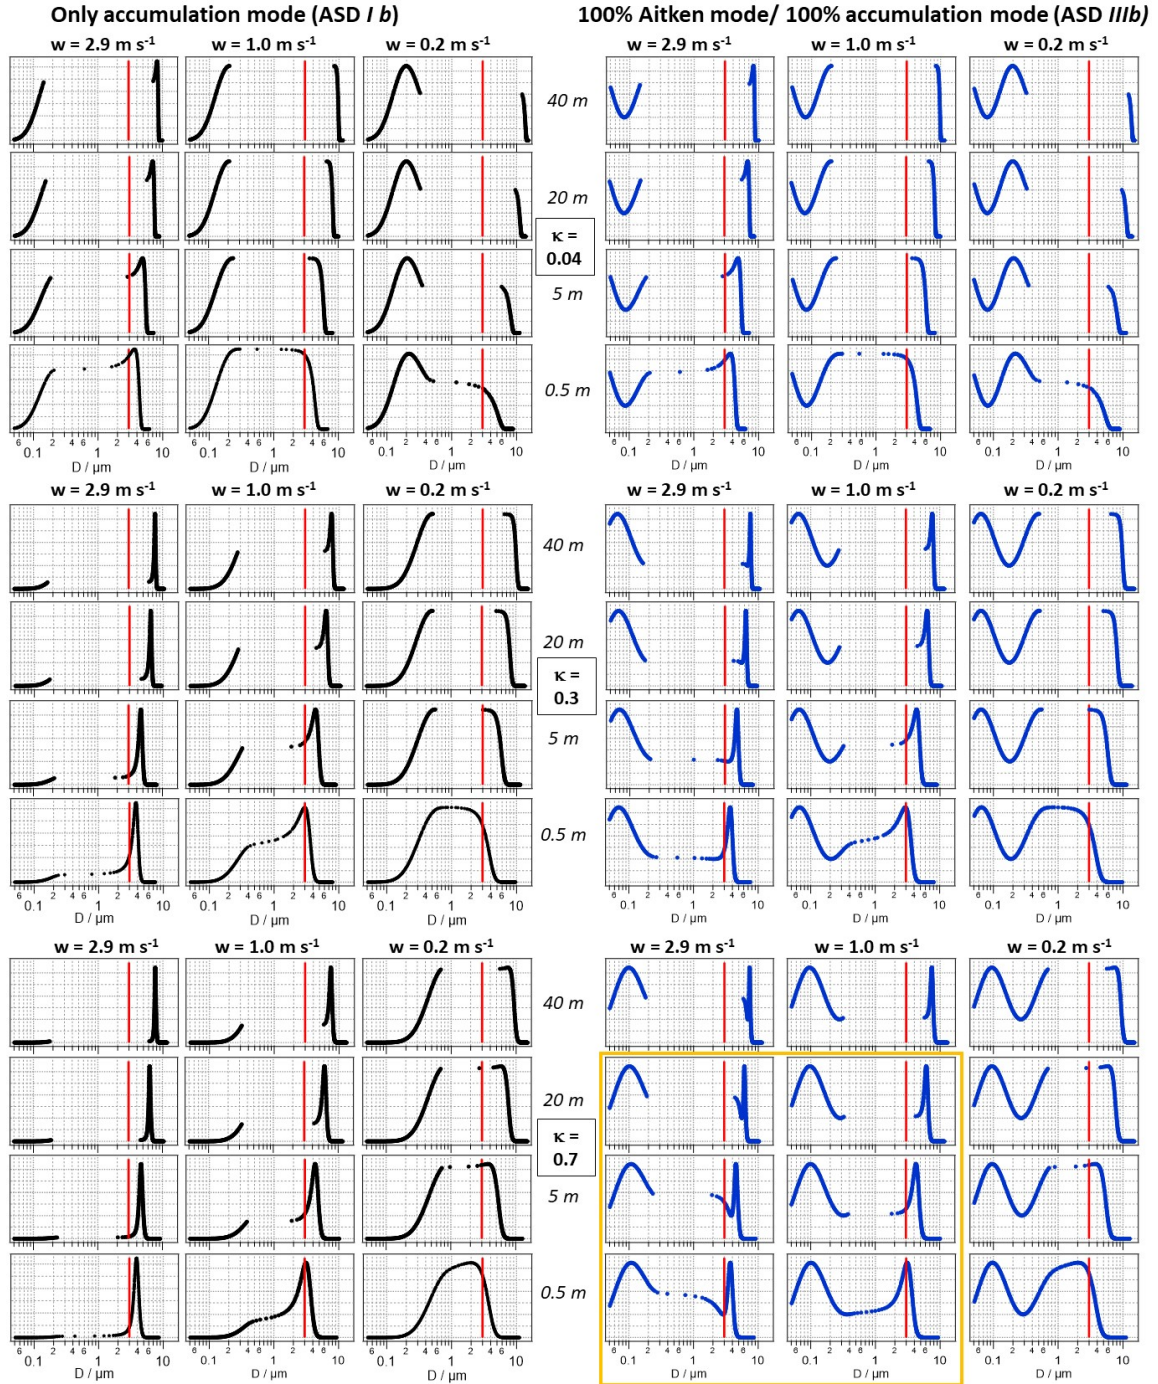

**Figure S4.** Size distributions of haze particles and cloud droplets as predicted for ASD I.b (black) and III.b (blue) at four heights above the level of RH = 100% (0.5 m, 5 m, 20 m, 40 m), three updraft velocities (columns) and three  $\kappa$  values (set of twelve panels each). The red lines mark the size threshold for cloud droplets ( $D_{wet} \geq 3 \mu\text{m}$ ). The orange box indicates the conditions under which Aitken mode particles start contributing to  $N_d$  (cf 'turnover' of  $\xi(\kappa)$  in Figure 2 f).

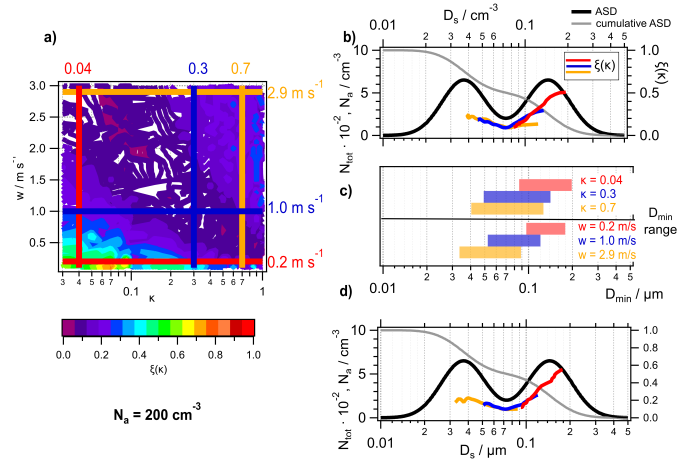

**Figure S5.** Same as Figure 3 but for ASD III.a ( $N_a = 200 \text{ cm}^{-3}$ )

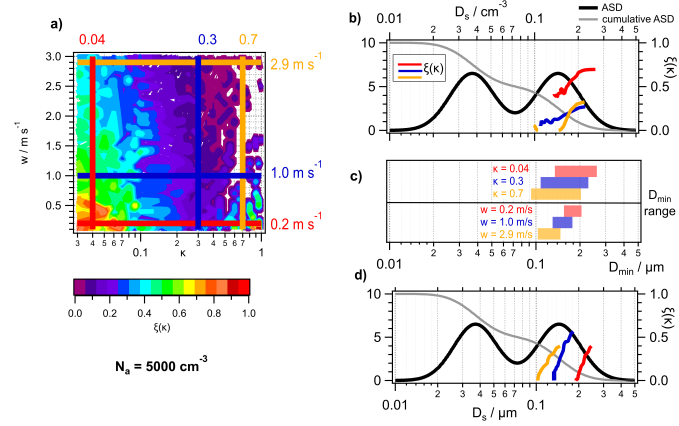

**Figure S6.** Same as Figure 3 but for ASD III.c ( $N_a = 5000 \text{ cm}^{-3}$ )

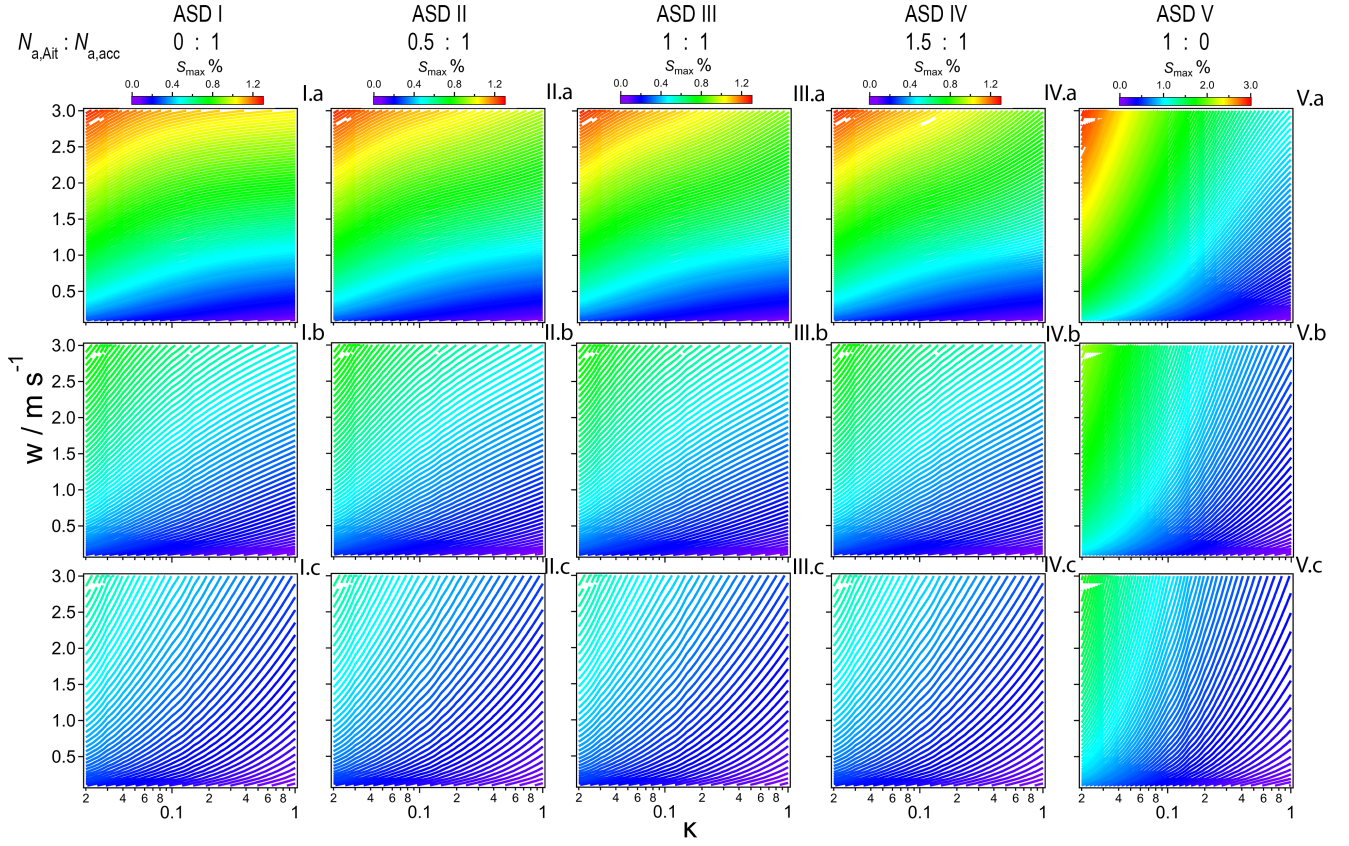

**Figure S7.** Supersaturation ( $s-1$  [%]) as a function of  $w$  and  $\kappa$  for ASDs I.a - V.c (Figure 1). The figures are based on 810 model simulations assuming 30 different values of  $w$  and 27 different values of  $\kappa$  for each ASD. Note that the color scales show  $S_{max} \leq 1.3\%$  for ASD I-IV and  $S_{max} \leq 3\%$  for ASD V.



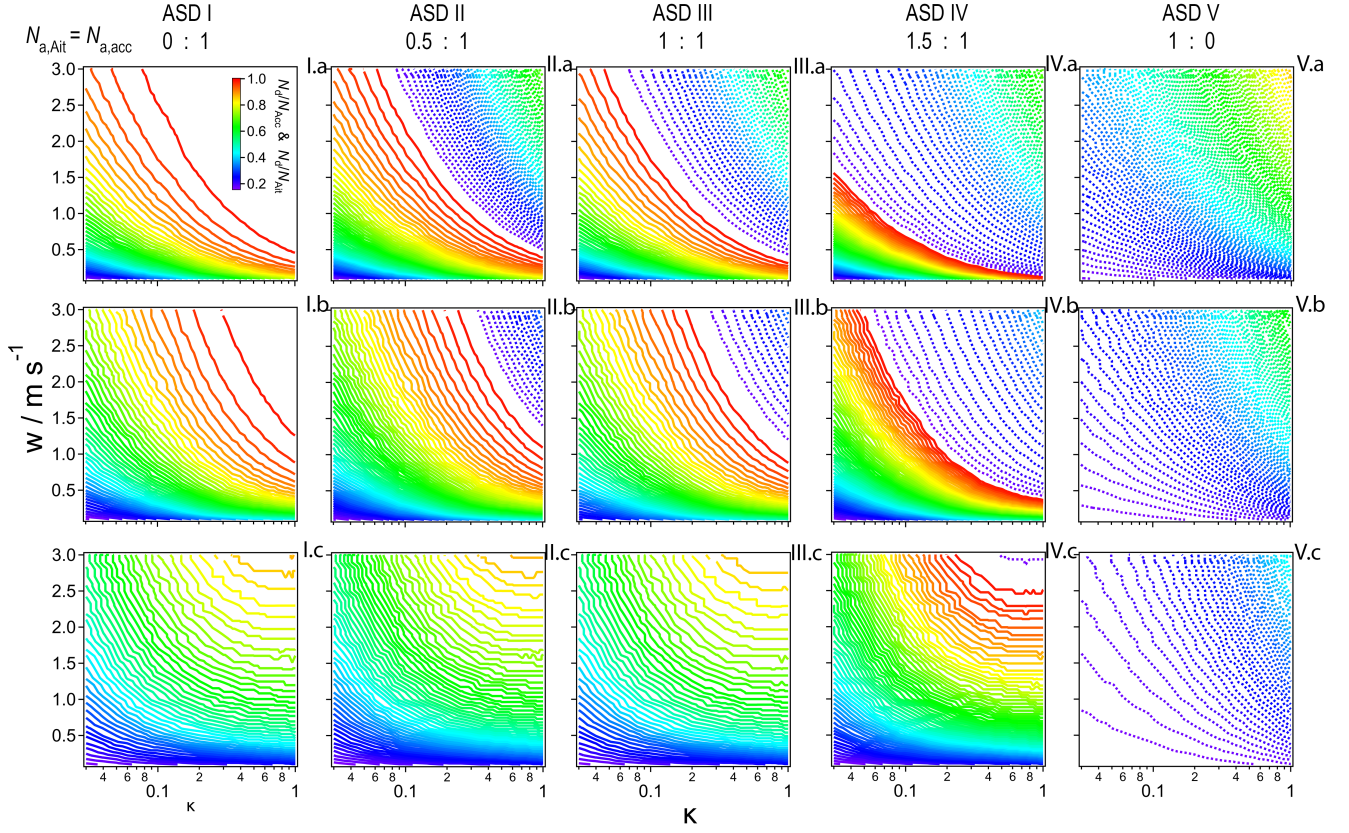

**Figure S8.** Activated fractions of Aitken and accumulation modes ( $F_{act,Ait}$  (dotted lines),  $F_{act,acc}$  (solid lines)) as a function of  $w$  and  $\kappa$  for ASDs I.a - V.c (Figure 1). The figures are based on 810 model simulations assuming 30 different values of  $w$  and 27 different values of  $\kappa$  for each ASD.

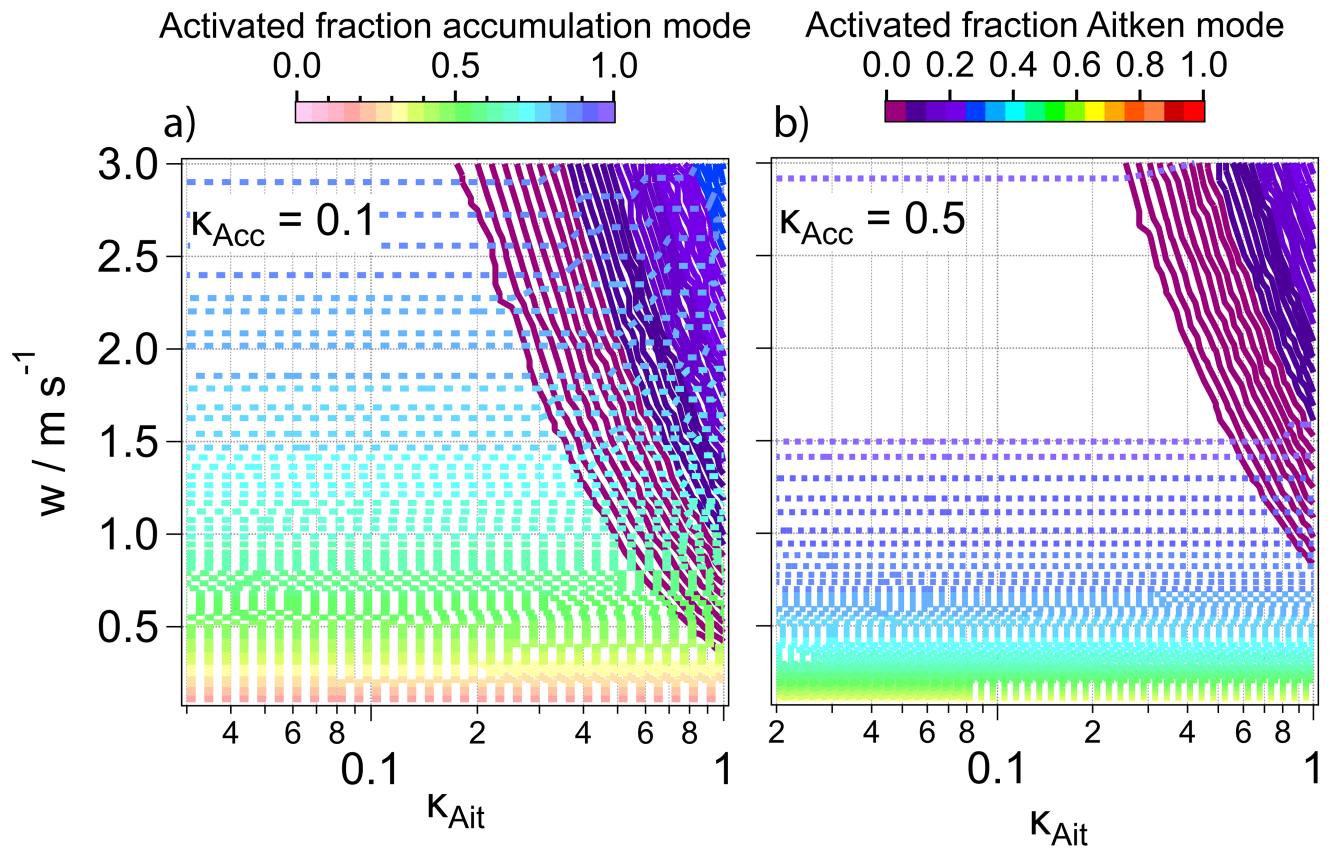

**Figure S9.** Activated fractions for accumulation mode ( $F_{act,acc}$ , dashed lines,  $\leq 1$ ) and Aitken mode ( $F_{act,Ait}$ , solid lines) for a)  $\kappa_{acc} = 0.1$  and b)  $\kappa_{acc} = 0.5$ , corresponding to the results in Figure 6 c and d.
